# Supplementary figures and images for: One-tube nested PCR mediated CRISPR-Cas12a: A novel performance-enhanced approach for ultrasensitive fluorescent visual screening of Salmonella
Source: Research Square preprint supplement (doi:10.21203/rs.3.rs-7534316/v1), 2025-09-18

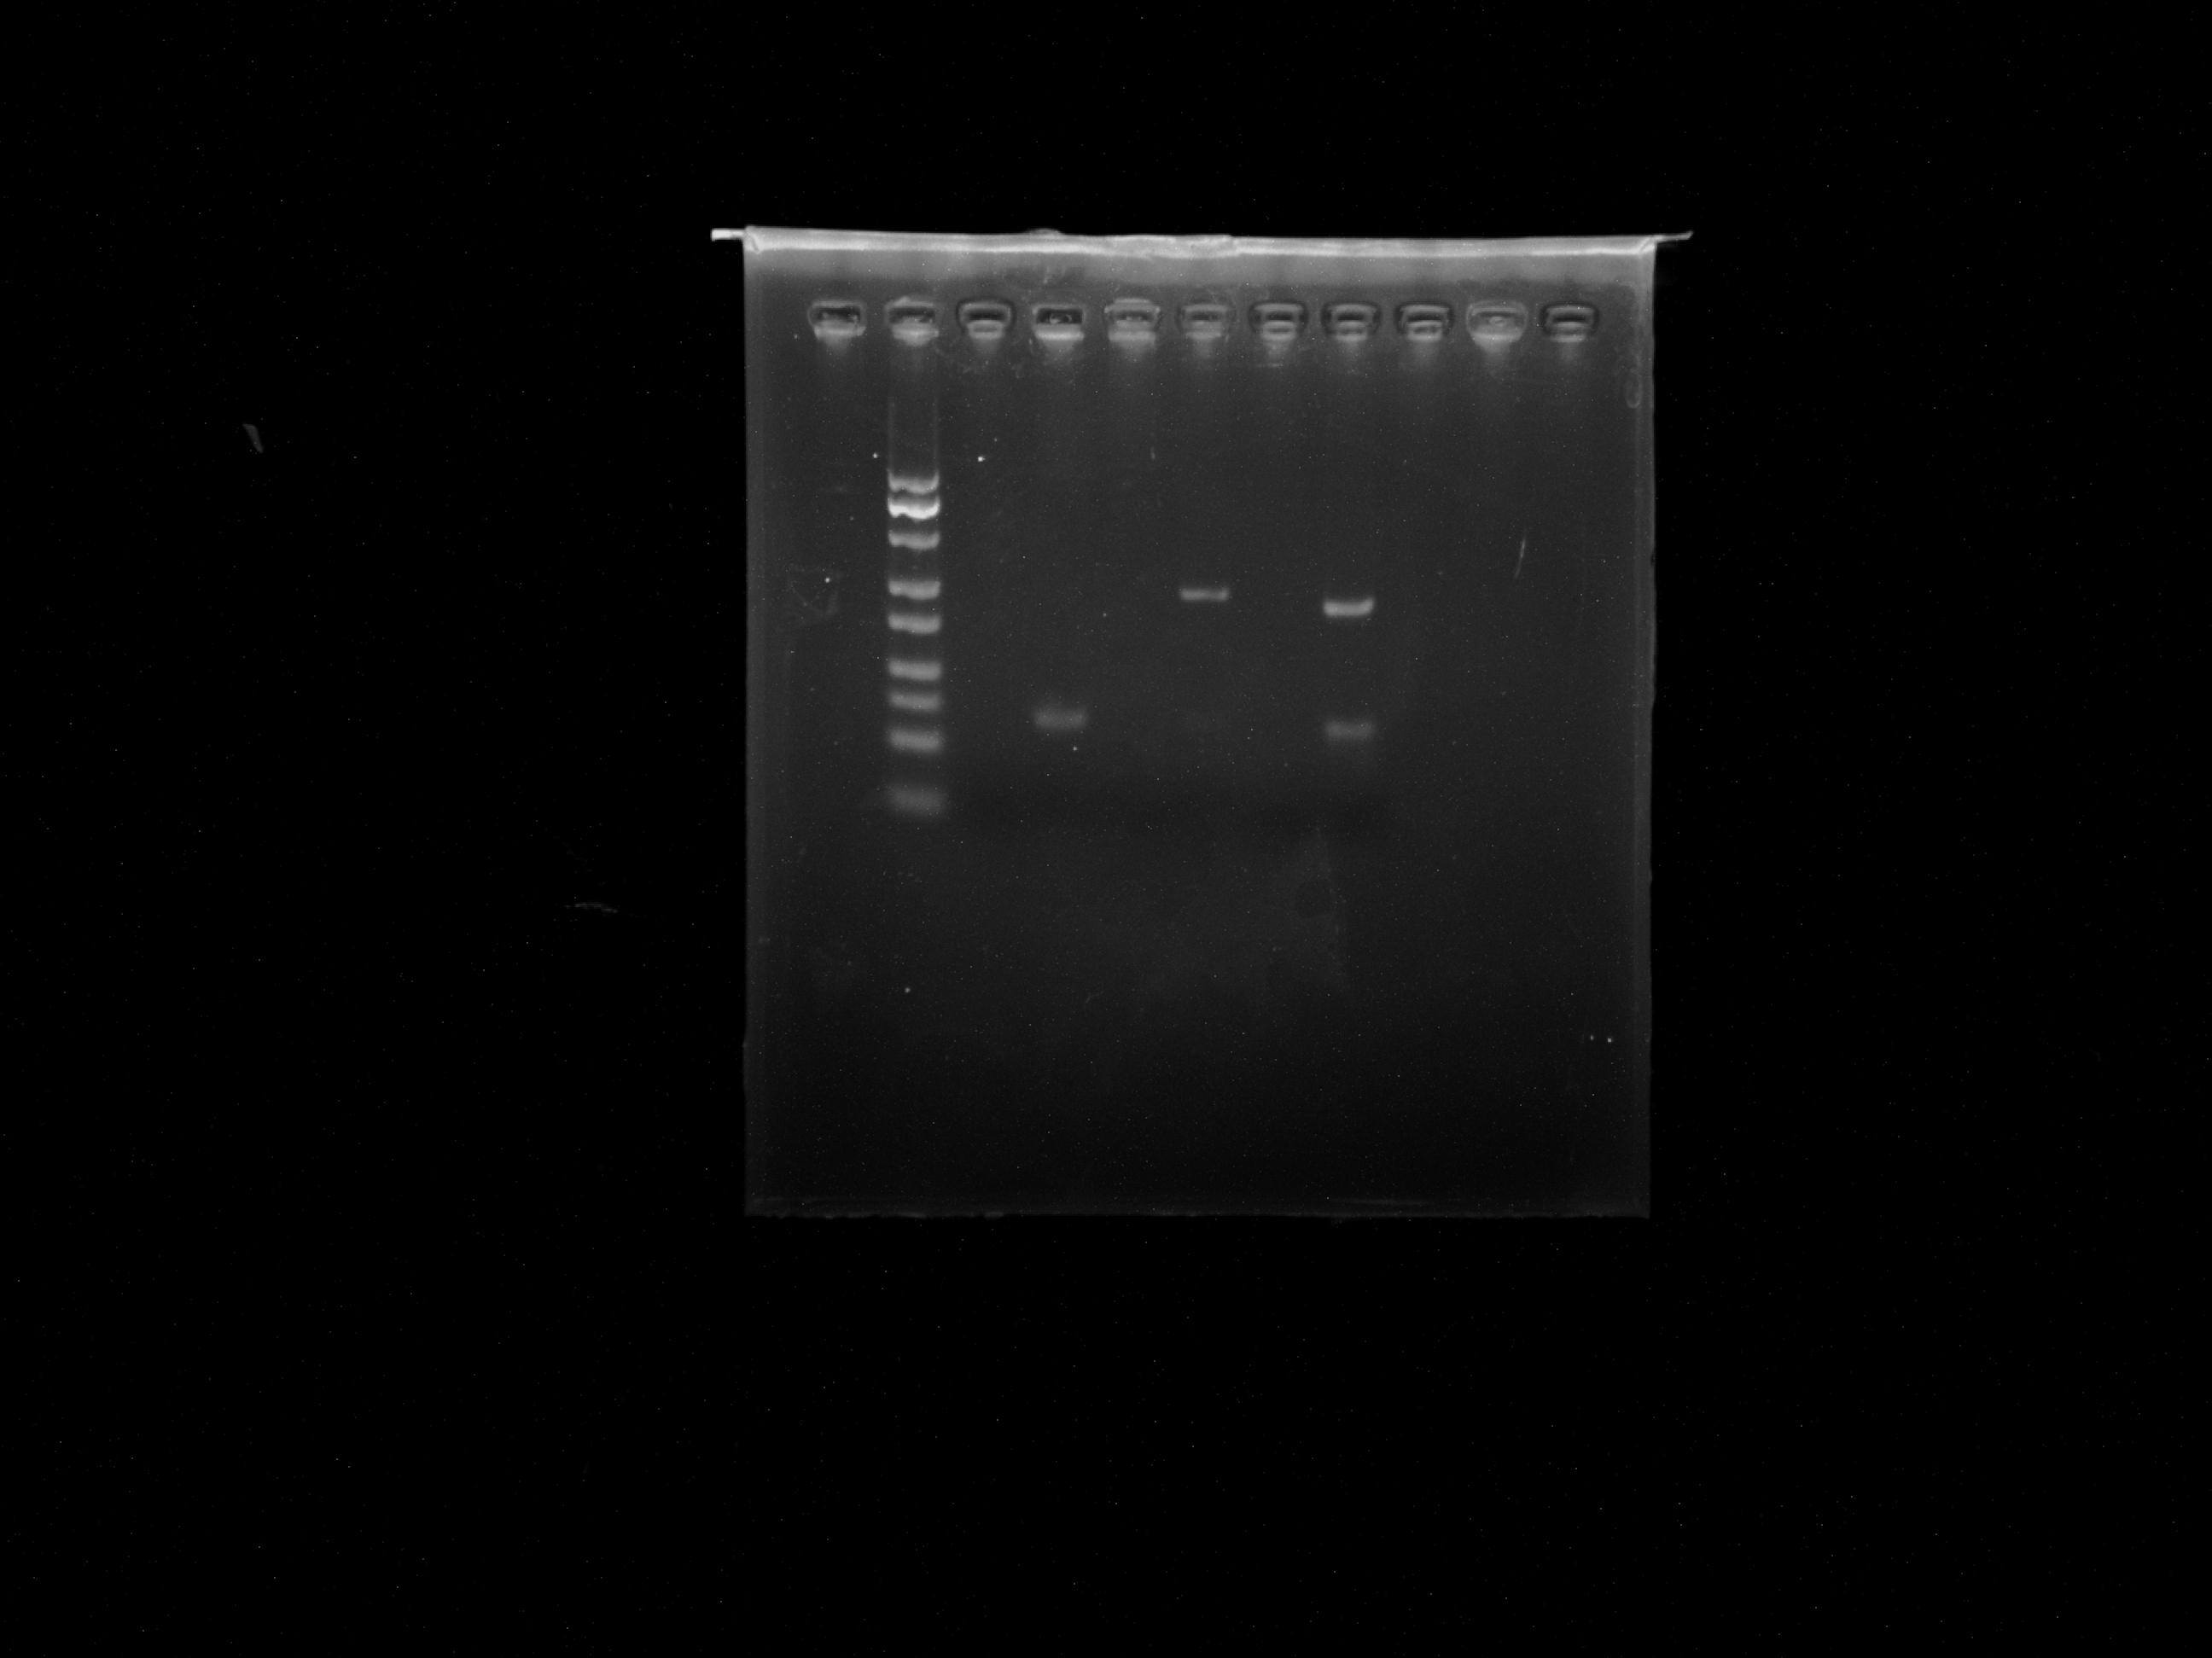

Supplement: Supplementary file 1 [file 1d269aa158fd4deb0db7883b.docx]
